# Supplementary material
Source: Royal Society of Chemistry journal article supplement (doi:10.1039/d6tc00594b)
Supplement: d6tc00594b1.pdf [file d6tc00594b1.pdf]

## Supporting Information

# Reversible polymorph-to-amorphous phase transformation based on an aggregation-dependent thermally activated delayed fluorescence emitter

Jianai Chen,<sup>†</sup> Xingshun Yang,<sup>†</sup> Xinjie Xu,<sup>†</sup> Mingjiao Sun,<sup>†</sup> Rule Zhang,<sup>†</sup> Dongcheng Li,<sup>†</sup> Linjie

Ma,<sup>†</sup> Yujie Dong,<sup>\*,†</sup> Weijun Li<sup>\*,†</sup> and Fener Chen<sup>\*,†,‡</sup>

<sup>†</sup> Institute of Pharmaceutical Science and Technology, College of Chemical Engineering, Zhejiang University of Technology, Hangzhou 310014, P. R. China; State Key Laboratory of Green Chemical Synthesis and Conversion, Zhejiang University of Technology, Hangzhou 310014, China.

<sup>‡</sup>Engineering Center of Catalysis and Synthesis for Chiral Molecules, Department of Chemistry, Fudan University, 220 Handan Road, Shanghai, 200433, PR China.

**Keywords:** multifunction, polymorph-to-amorphous, information encryption, TADF

**\*Corresponding Author**

E-mail: dongyujie@zjut.edu.cn; liwj@zjut.edu.cn; rfchen@fudan.edu.cn

## **Supporting Information**

### **Table of Contents**

#### **1. Synthesis**

#### **2. Molecular packing of DG and DY**

#### **3. DFT of DG and DY**

#### **4. PL spectra and Lifetime measurement of DMAC-PYZ**

#### **5. Mechanochromism Experiments**

## 1. Synthesis

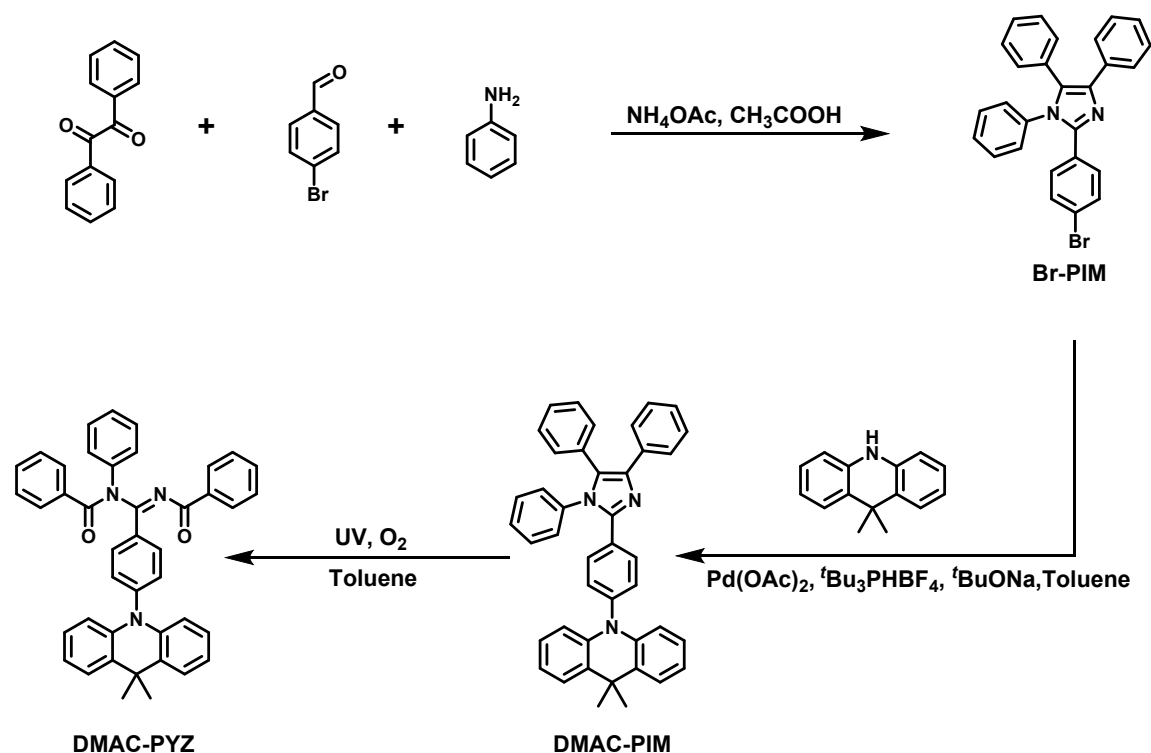

Scheme S1. The synthesis of DMAC-PYZ.

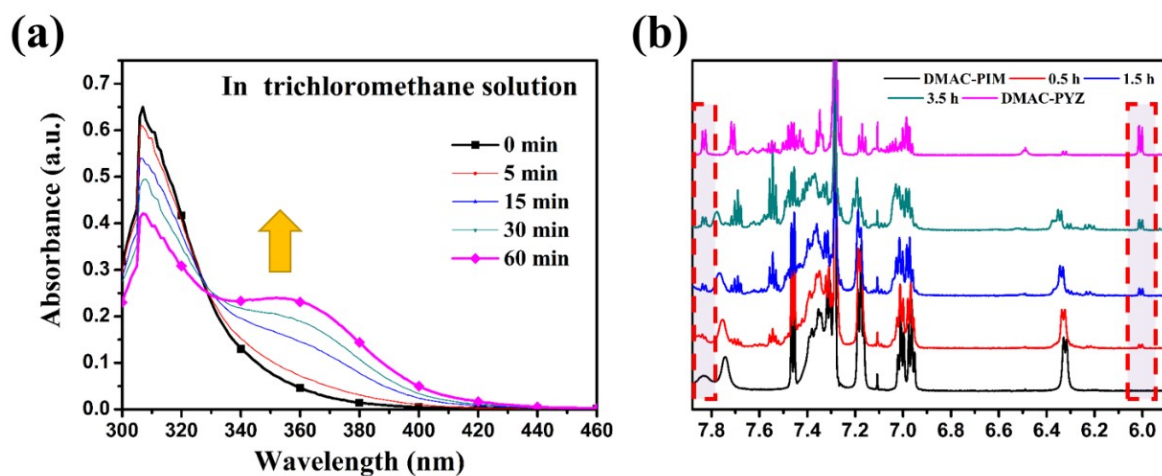

Figure S1. (a) In situ absorption spectra of DMAC-PIM in trichloromethane solvent at  $10^{-5} \text{ mol L}^{-1}$  under different UV irradiation (365 nm, 6 w) time in air ( $\text{O}_2$ ). (b) The in situ  $^1\text{H}$  NMR spectra of DMAC-PIM in  $\text{CDCl}_3$  solvents under UV irradiation for different time with that of DPA-PYZ used as reference.

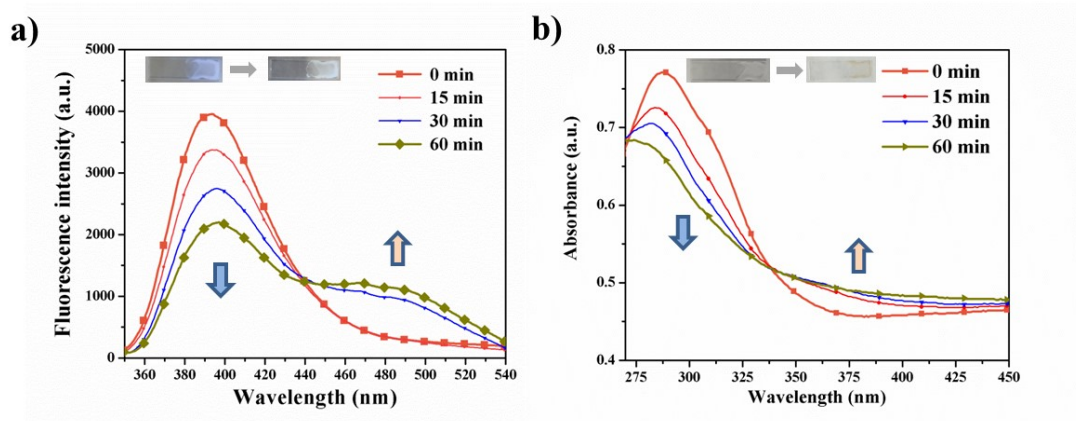

**Figure S2.** In situ fluorescence spectra (a) and absorption spectra (b) of DMAC-PIM in PMMA film under different UV irradiation (365 nm, 6 w) time in air ( $O_2$ ).

## 2. Molecular packing of DG and DY

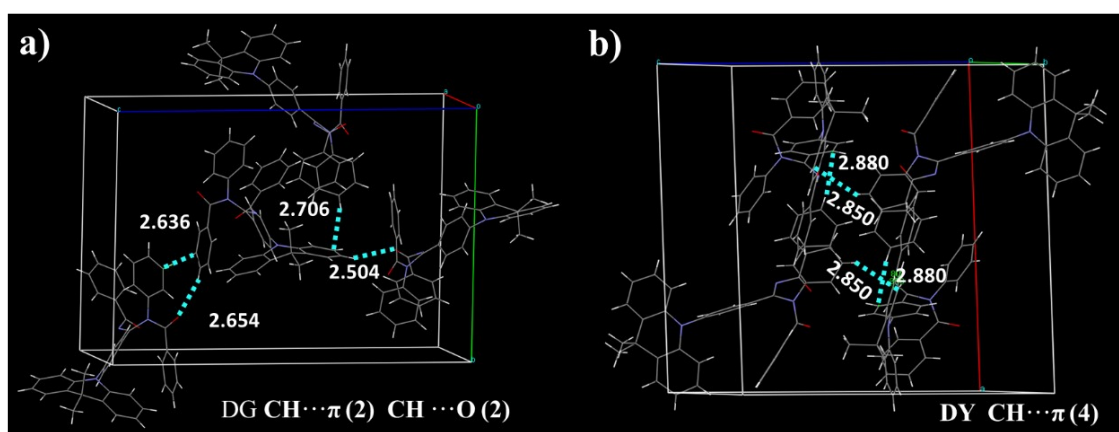

**Figure S3.** The unit cell of DG and DY single crystals.

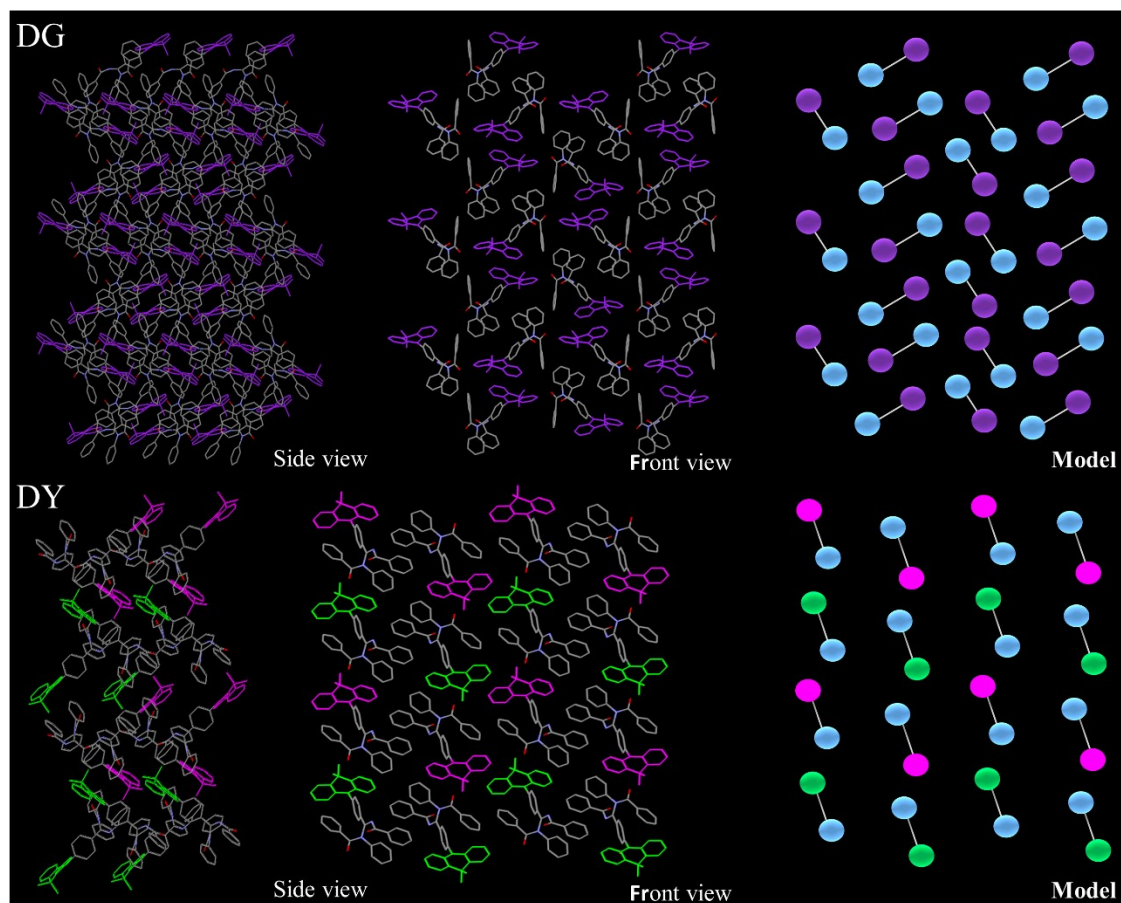

**Figure S4.** Molecular packing of DG and DY.

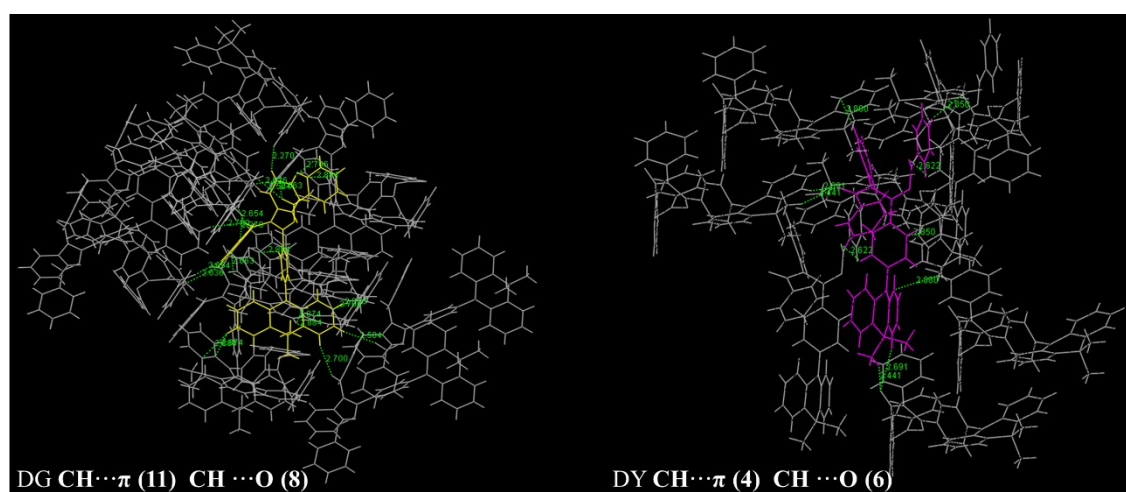

**Figure S5.** Molecular packing of DG and DY.

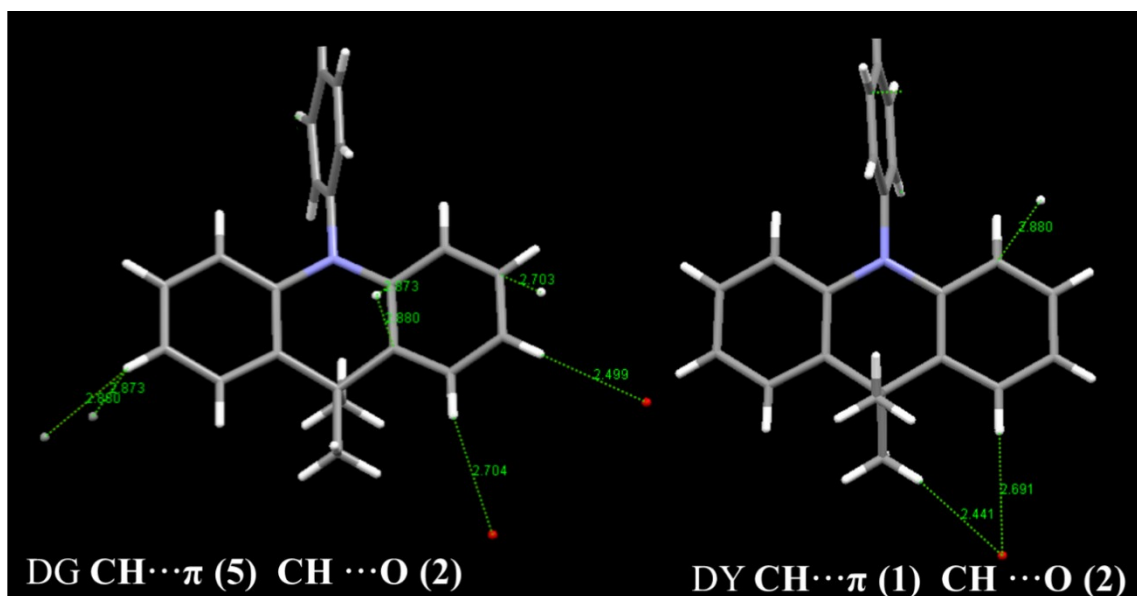

**Figure S6.** Molecular packing of DMAC moiety of DG and DY DFT of DG and DY.

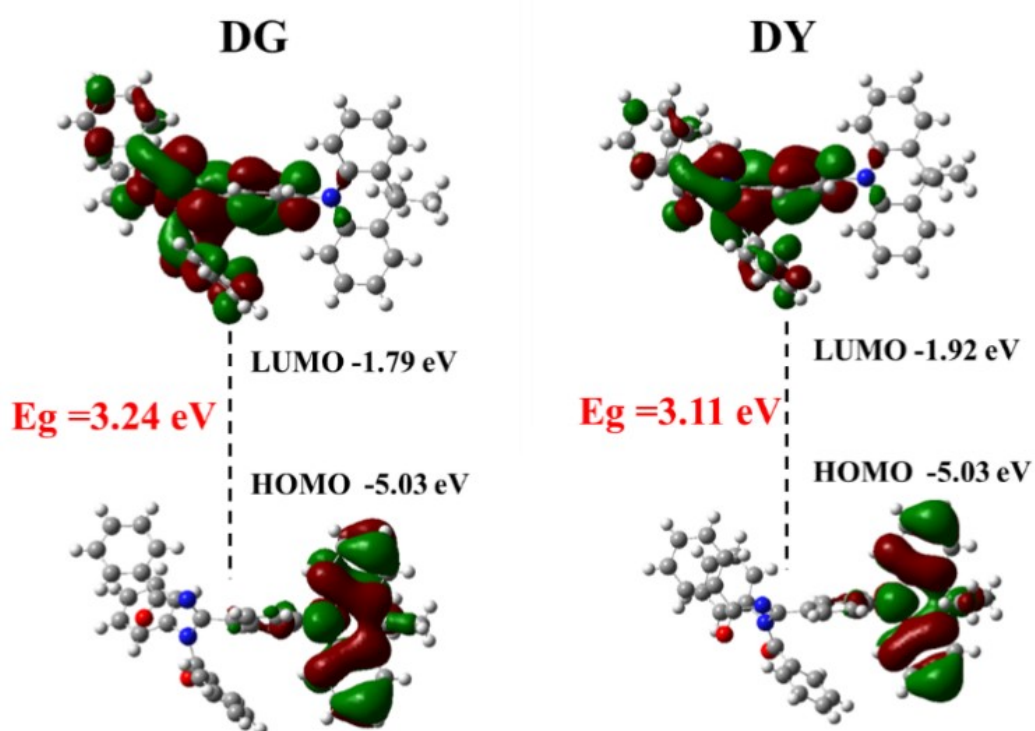

**Figure S7.** Diagram of theoretical calculated frontier orbital contribution based on B3LYP-6-31g of DG and DY.

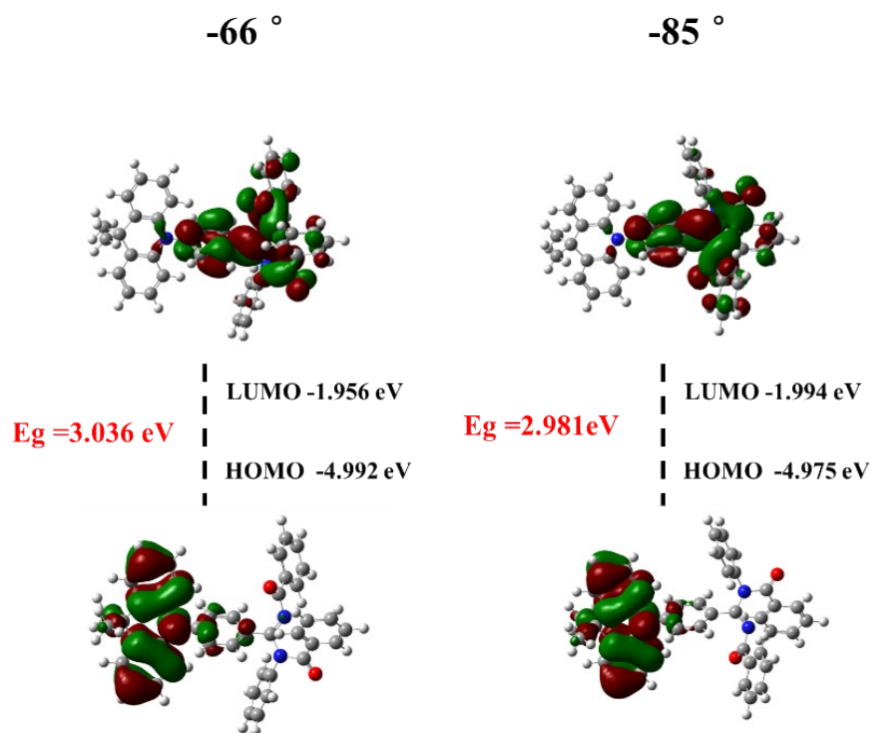

**Figure S8.** Diagram of theoretical calculated frontier orbital contribution based on B3LYP-6-31g of DMAC-PYZ with the  $-66^\circ$  and  $-85^\circ$  twisted angle between donor and acceptor group.

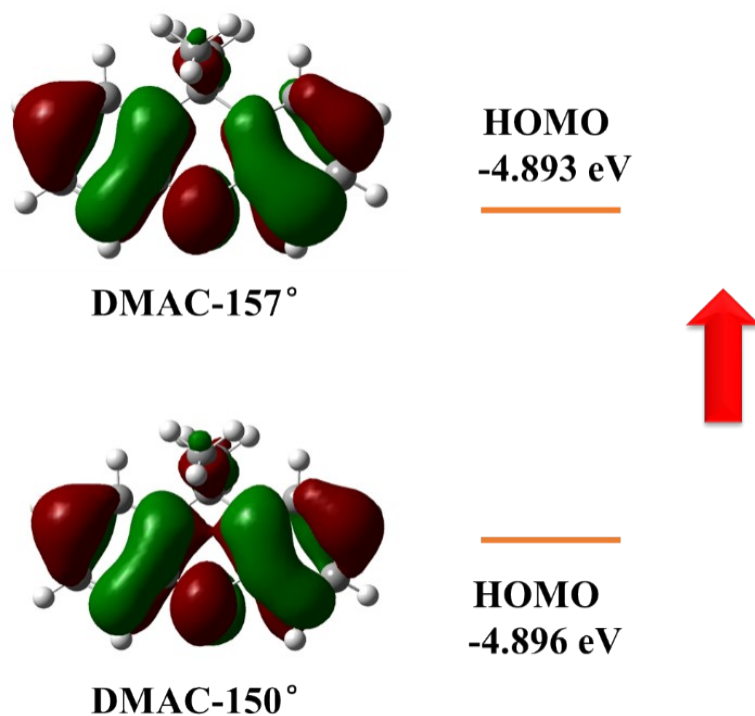

**Figure S9.** Diagram of theoretical calculated frontier orbital contribution based on B3LYP-6-31g of DMAC donor group with the  $157^\circ$  and  $150^\circ$  dihedral angle.

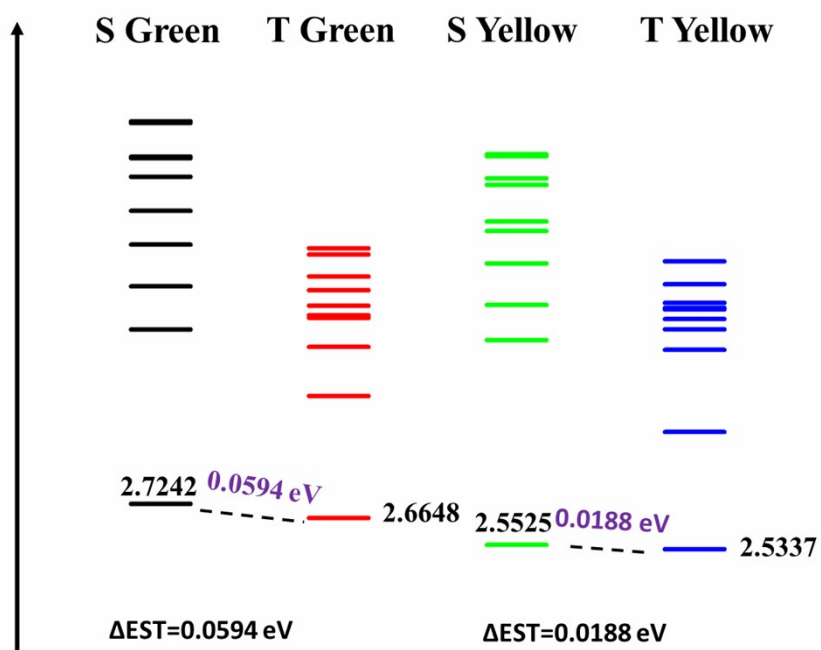

**Figure S10.** Energy level diagram for singlet and triplet excited states calculated with TD-DFT: m062x/6-31g (d, p).

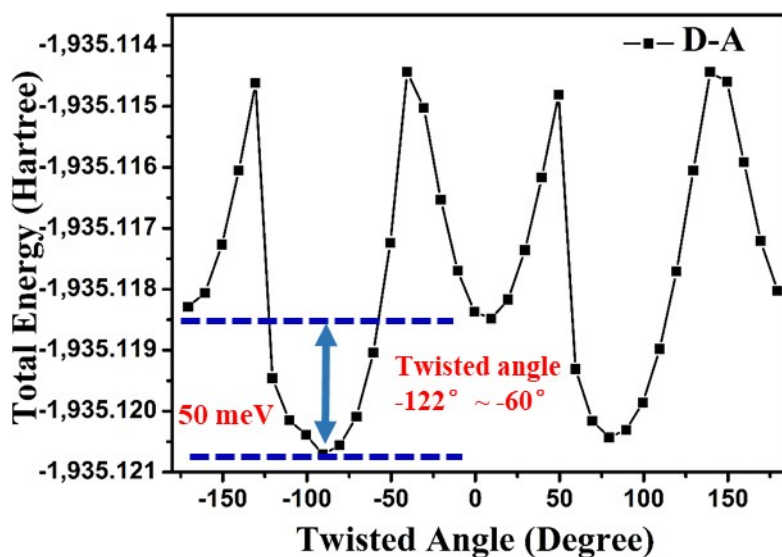

**Figure S11.** The ground state energy of DMAC-PYZ at different twist angles between DMAC donor and PYZ acceptor in the gas phase using the B3lyp method.

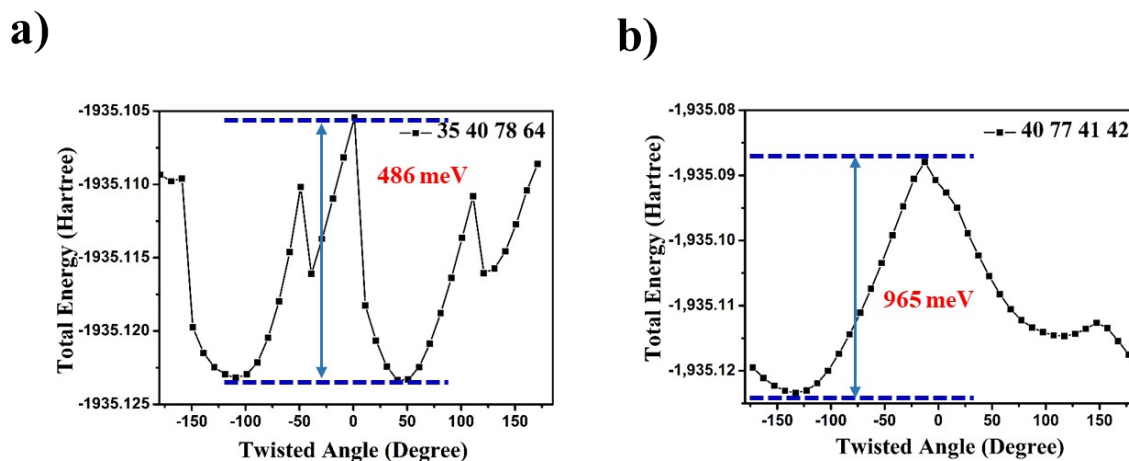

**Figure S12.** The ground state energy of step 1 a) and Step 2 b) during the conversion between S-Y and R-Y in the gas phase using the B3lyp method.

### 3. PL spectra and Lifetime measurement of DMAC-PYZ

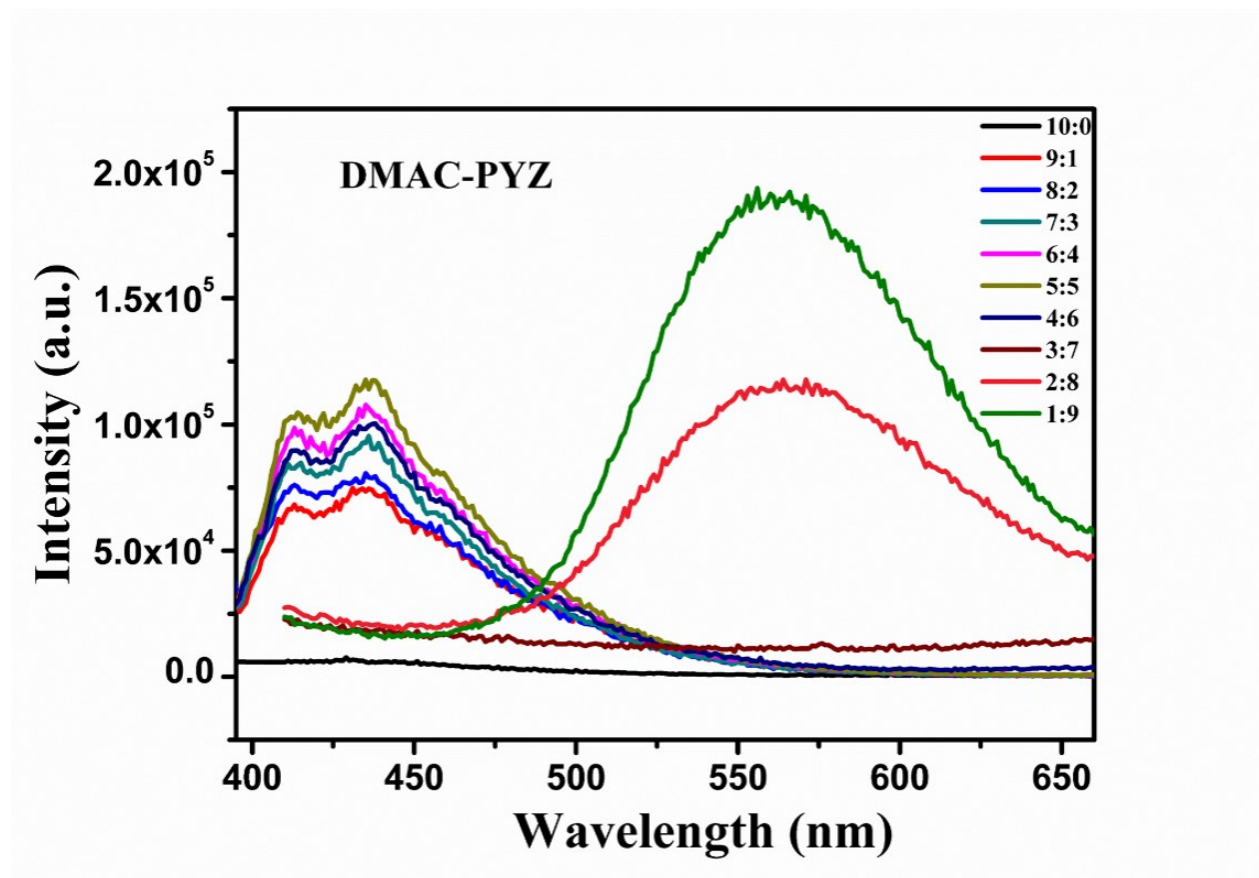

**Figure S13.** Fluorescence spectra of DMAC-PYZ in the THF: water mixtures ( $10^{-5}$  M).

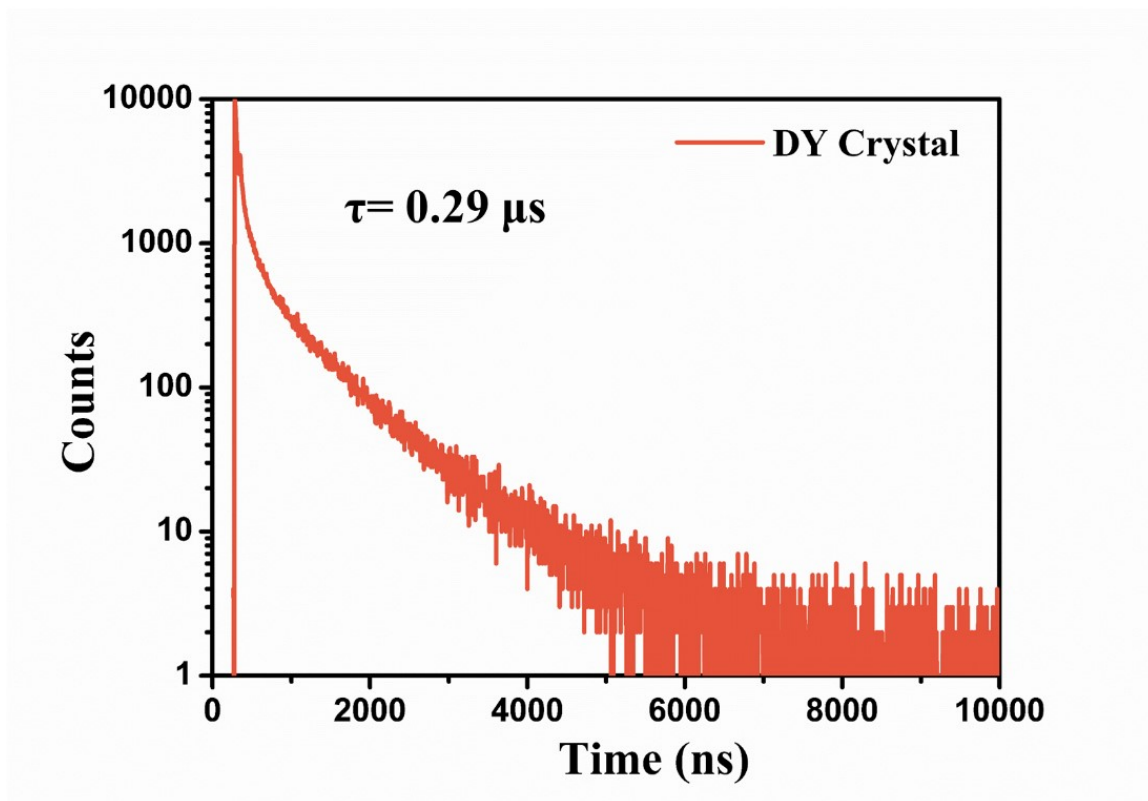

Figure S14. Lifetime measurement of crystals of DY measured at 540 nm.

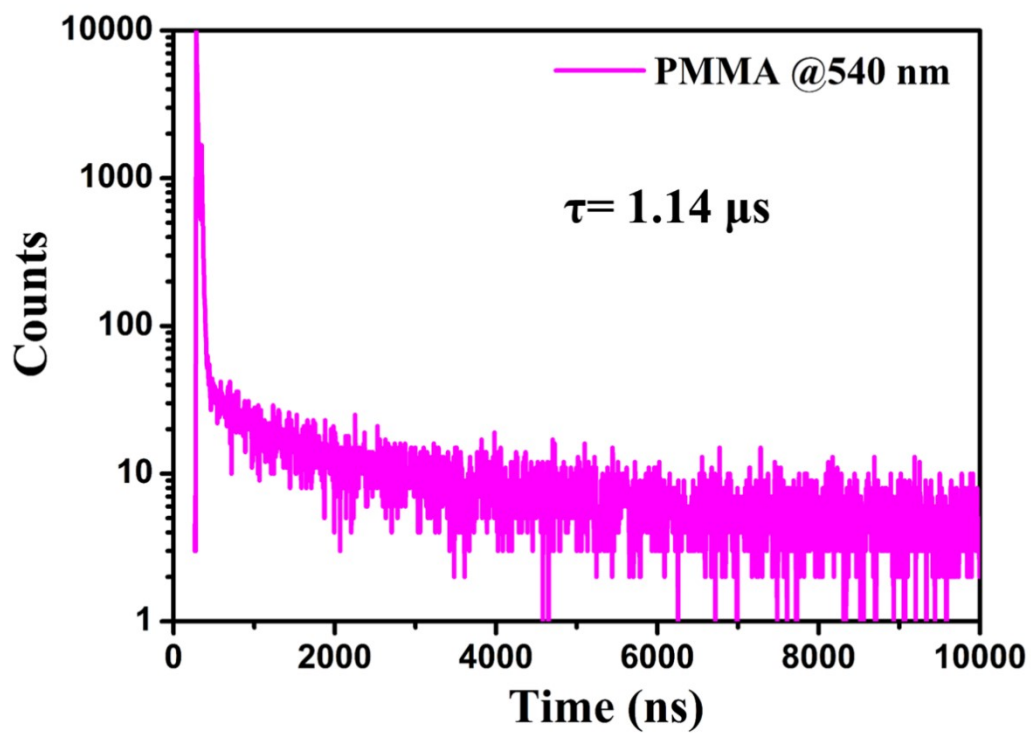

Figure S15. Lifetime measurement of DMAC-PYZ in PMMA doped film.

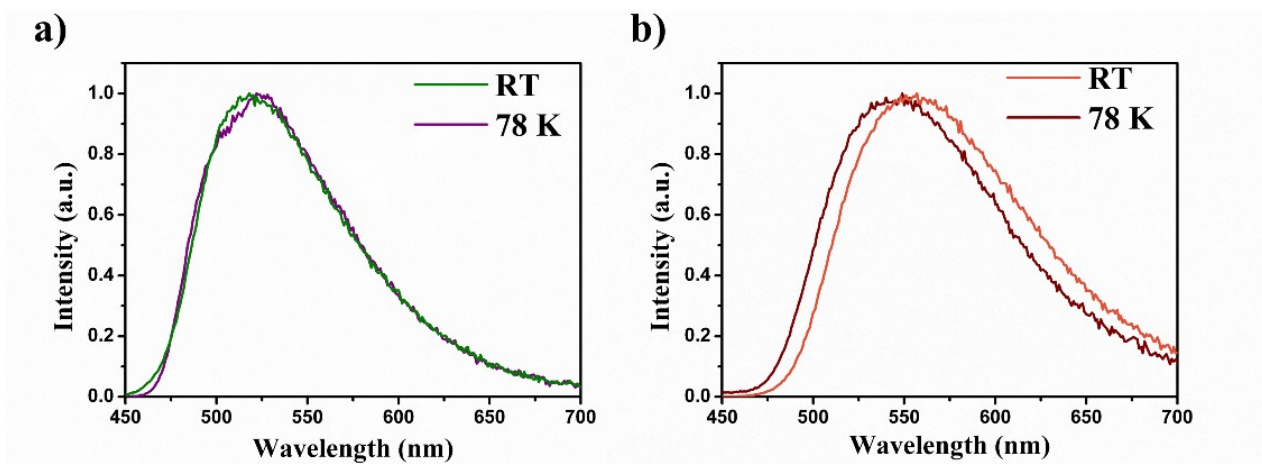

**Figure S16.** Fluorescence spectra of DG (a) and DY (b) at room temperature and 77

K.

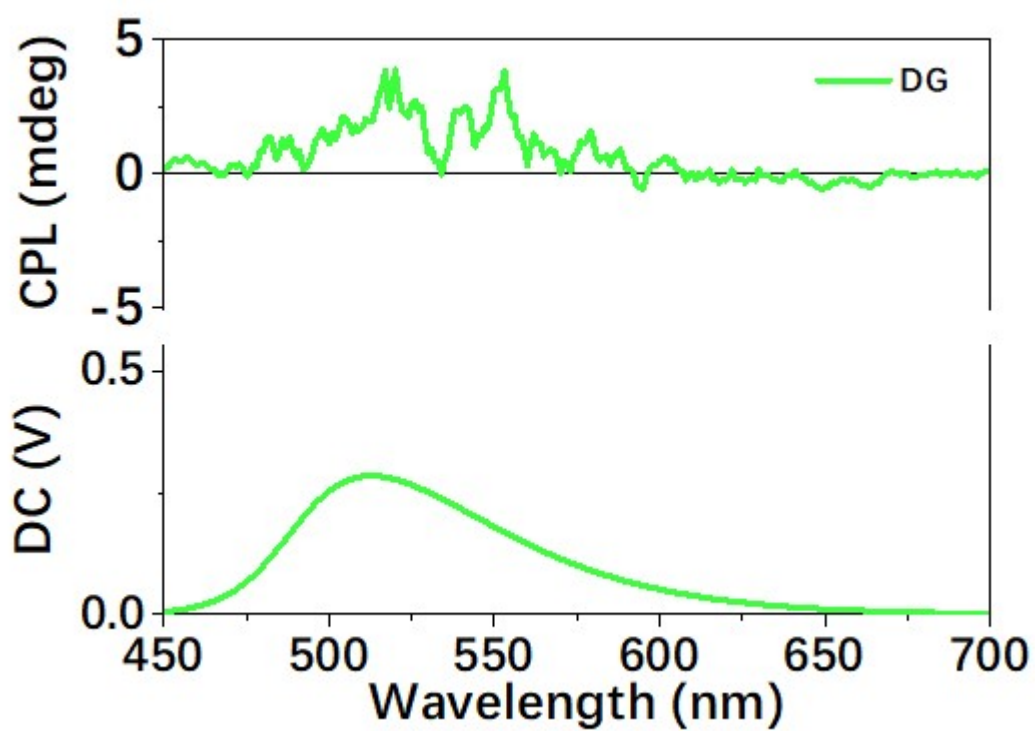

**Figure S17.** The CPL spectra of crystal DG.

#### 4. Mechanochromism Experiments

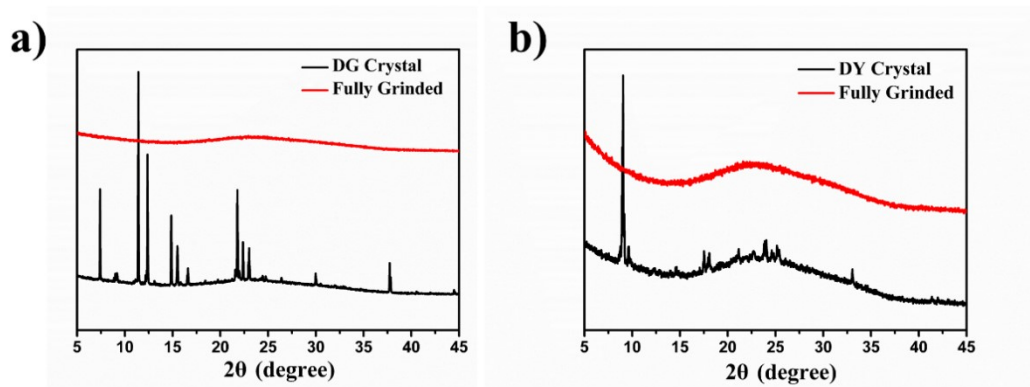

**Figure S18.** Powder X-ray diffraction (PXRD) data of DG (a) and DY (b) in the different solid states.

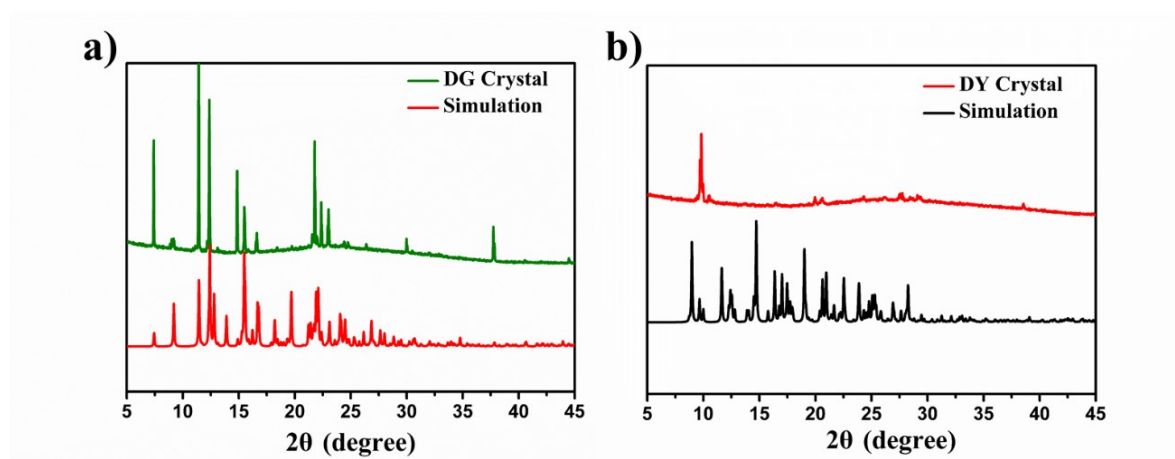

**Figure S19.** Powder X-ray diffraction (PXRD) data (with that simulated from single crystal structure as reference)

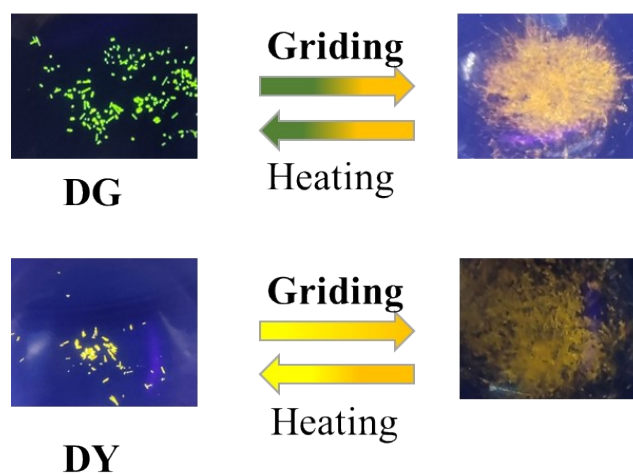

**Figure S20.** Photos of DG and DY under UV illumination under mechanical force and 60 °C thermal stimulation.

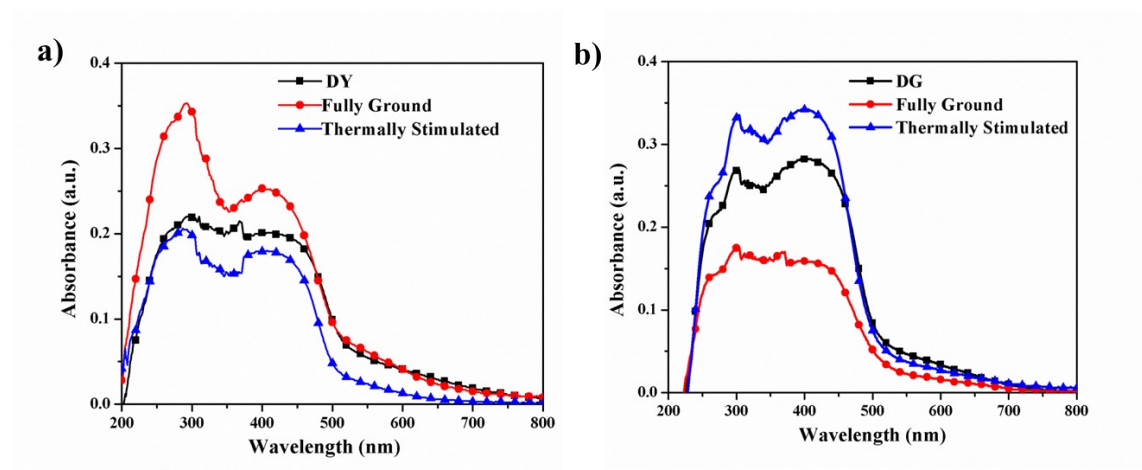

**Figure S21.** The Solid ultraviolet absorption spectra of amorphous DY a) and DG b) under mechanical force and 60 °C thermal stimulus.

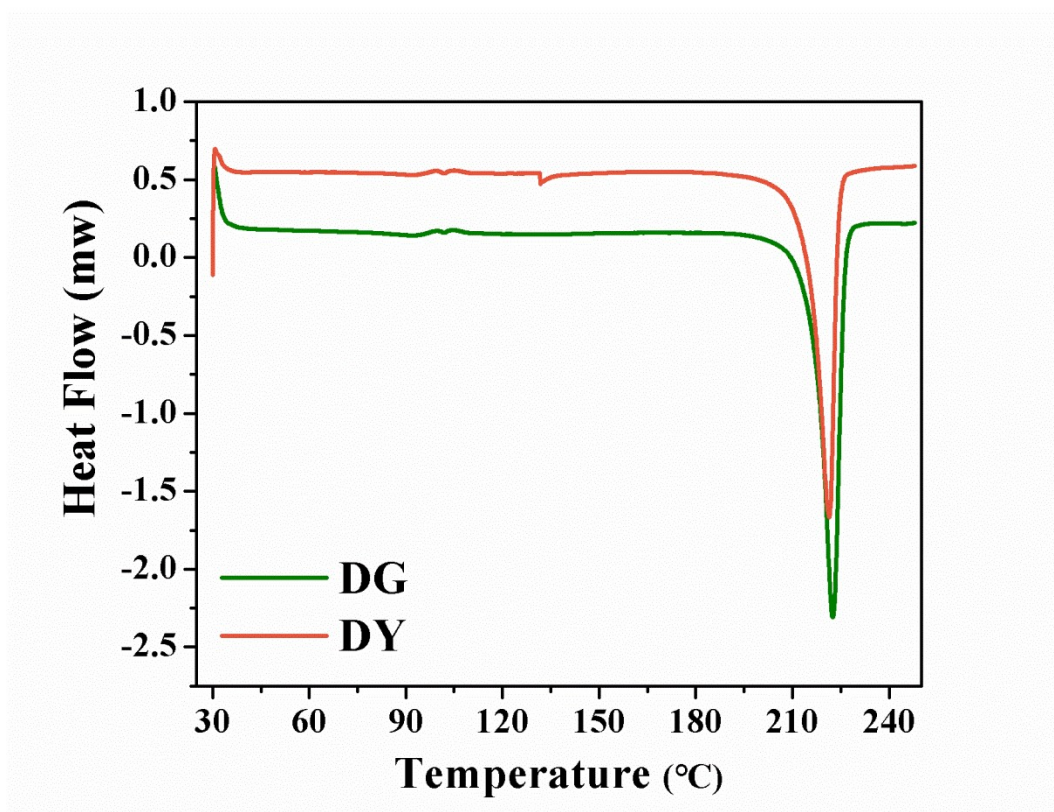

**Figure S22.** The DSC of the crystalline powders of DG and DY.

**Table S1.** Photo-physical data of DG and DY.

| Compound | $\lambda_{em}$<br>[nm] <sup>[a]</sup> | $t$<br>[ $\mu$ s] <sup>[a]</sup> | $\Phi_p$<br>[%] <sup>[b]</sup> |
|----------|---------------------------------------|----------------------------------|--------------------------------|
| DG       | 507                                   | 65.76                            | 45.6                           |
| DY       | 540                                   | 0.29                             | 6.1                            |

[a] The lifetimes of fluorescence. [b] The fluorescence PLQY under oxygen conditions.

**Table S2.** Crystal Data and Structure Refinements of Two Crystals

|                                             | DG                                                            | DY                                                            |
|---------------------------------------------|---------------------------------------------------------------|---------------------------------------------------------------|
| CCDC No.                                    | 2102068                                                       | 2102069                                                       |
| empirical formula                           | C <sub>42</sub> H <sub>33</sub> N <sub>3</sub> O <sub>2</sub> | C <sub>42</sub> H <sub>33</sub> N <sub>3</sub> O <sub>2</sub> |
| formula wt                                  | 611.71                                                        | 611.71                                                        |
| <i>T</i> , K                                | 296(2)                                                        | 296(2)                                                        |
| crystal system                              | orthorhombic                                                  | monoclinic                                                    |
| space group                                 | P 21 21 21                                                    | P 21/c                                                        |
| <i>a</i> , Å                                | 8.4928(12)                                                    | 19.704(4)                                                     |
| <i>b</i> , Å                                | 16.372(2)                                                     | 8.1962(17)                                                    |
| <i>c</i> , Å                                | 23.775(3)                                                     | 20.230(4)                                                     |
| $\alpha$ ,deg                               | 90                                                            | 90                                                            |
| $\beta$ ,deg                                | 90                                                            | 92.408(4)                                                     |
| $\gamma$ ,deg                               | 90                                                            | 90                                                            |
| <i>V</i> ,Å <sup>3</sup>                    | 3305.9(8)                                                     | 3264.2(12)                                                    |
| <i>Z</i>                                    | 4                                                             | 4                                                             |
| density, Mg/m <sup>3</sup>                  | 1.231                                                         | 1.245                                                         |
| <i>M</i> (Mo K $\alpha$ ), mm <sup>-1</sup> | 0.076                                                         | 0.077                                                         |
| $\theta$ range, deg                         | 2.63-18.65                                                    | 2.827-24.998                                                  |
| no. of reflns collected                     | 18343                                                         | 16011                                                         |
| no. of unique reflns                        | 6492                                                          | 5726                                                          |
| R(int)                                      | 0.0634                                                        | 0.0539                                                        |
| GOF                                         | 0.972                                                         | 0.918                                                         |
| R1 [ <i>I</i> > 2 $\sigma$ ( <i>I</i> )]    | 0.0570                                                        | 0.0549                                                        |
| wR2 [ <i>I</i> > 2 $\sigma$ ( <i>I</i> )]   | 0.1109                                                        | 0.1300                                                        |
| R1 (all data)                               | 0.1467                                                        | 0.1133                                                        |
| wR2 (all data)                              | 0.1445                                                        | 0.1618                                                        |
